# Supplementary material
Source: Springer Nature journal article supplement (https://www.springermedizin.de/resource/supplementary/13058_2010_2751_MOESM13_ESM.pdf/9702078)

a)

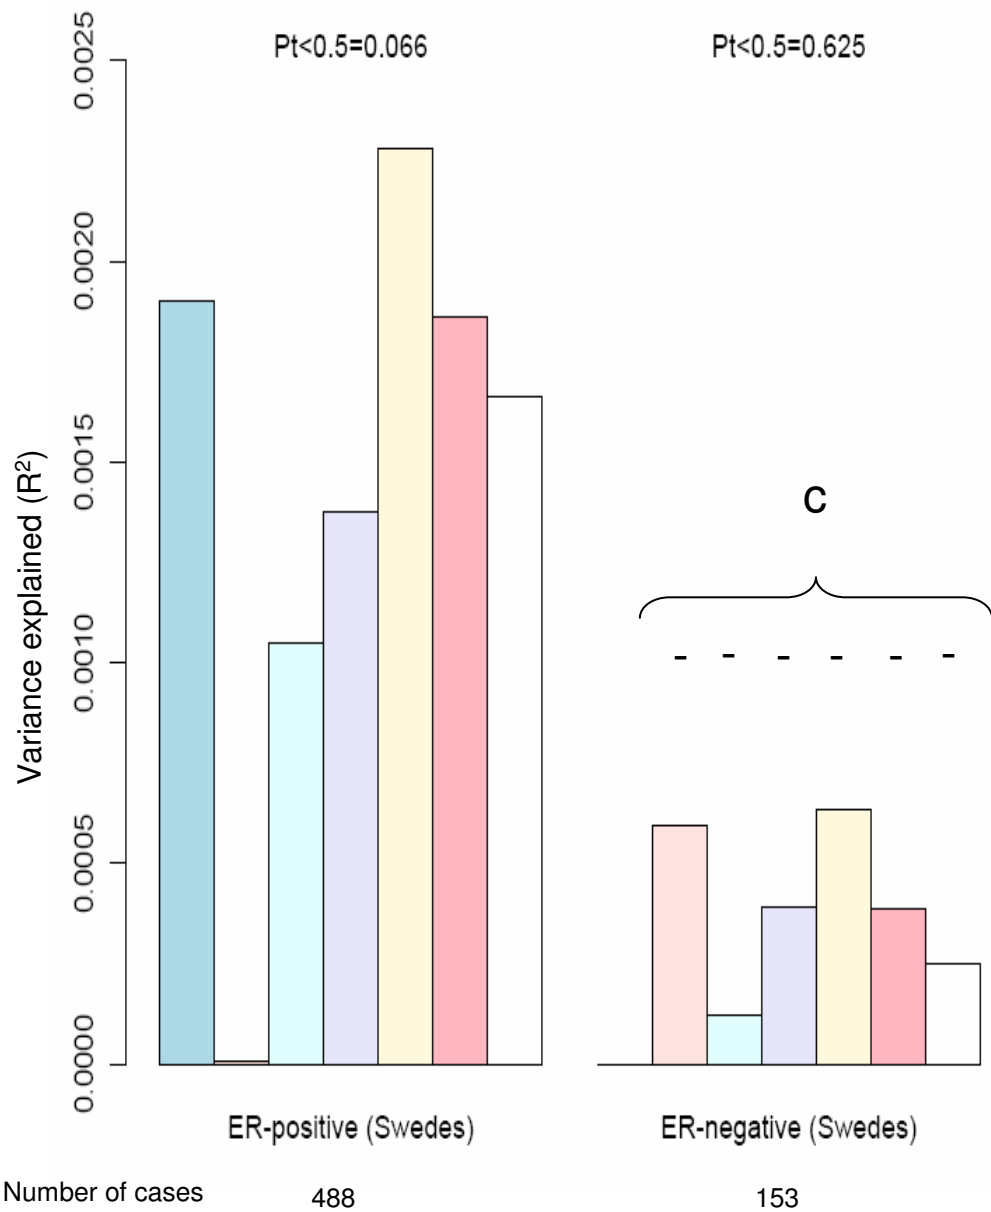

b)

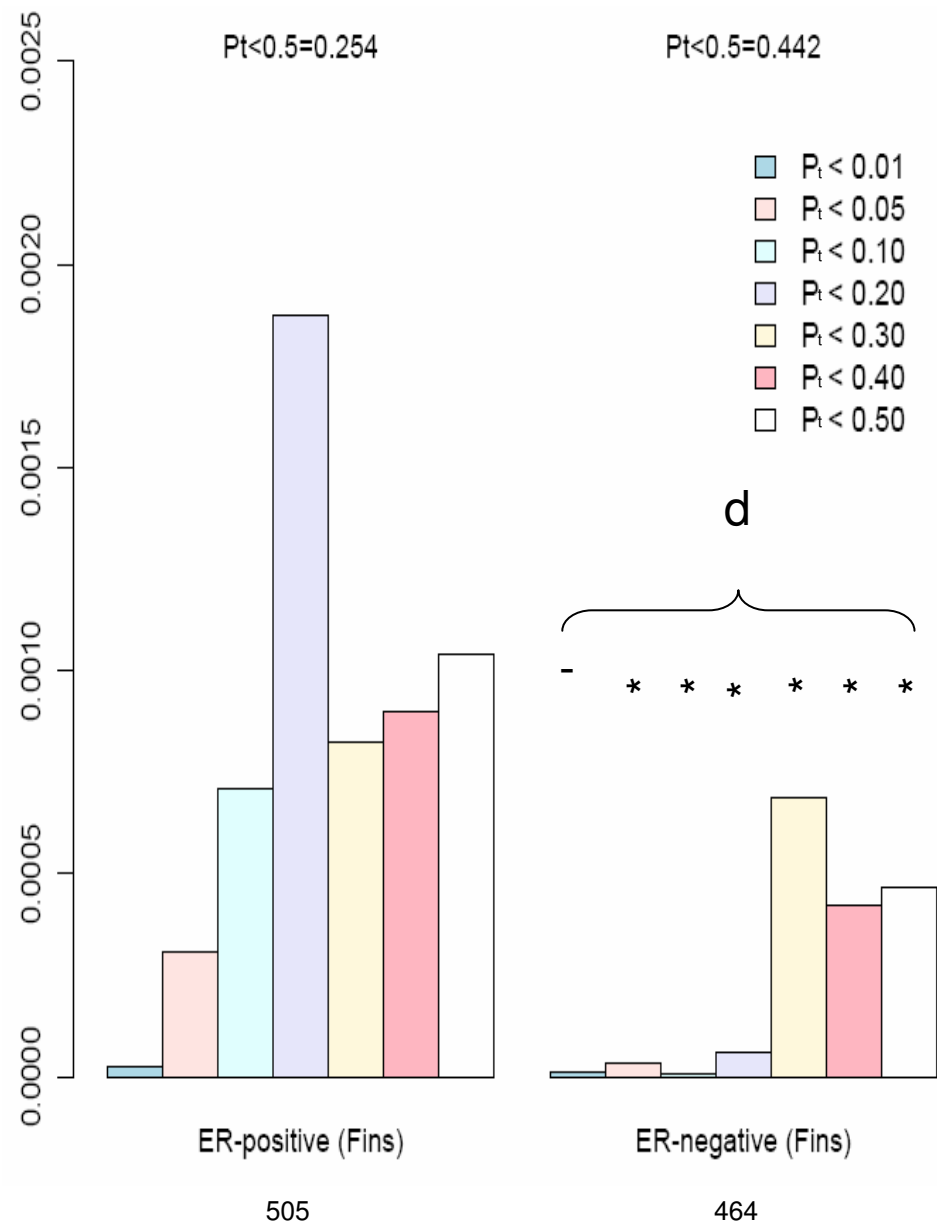

ER-positive Fins used as training set

ER-positive Swedes used as training set

Supplement: MOESM13 [file 9702078]
